# Supplementary material
Source: Springer Nature journal article supplement (https://www.springermedizin.de/resource/supplementary/12889_2011_3881_MOESM3_ESM.pdf/9493388)

## Palestinians

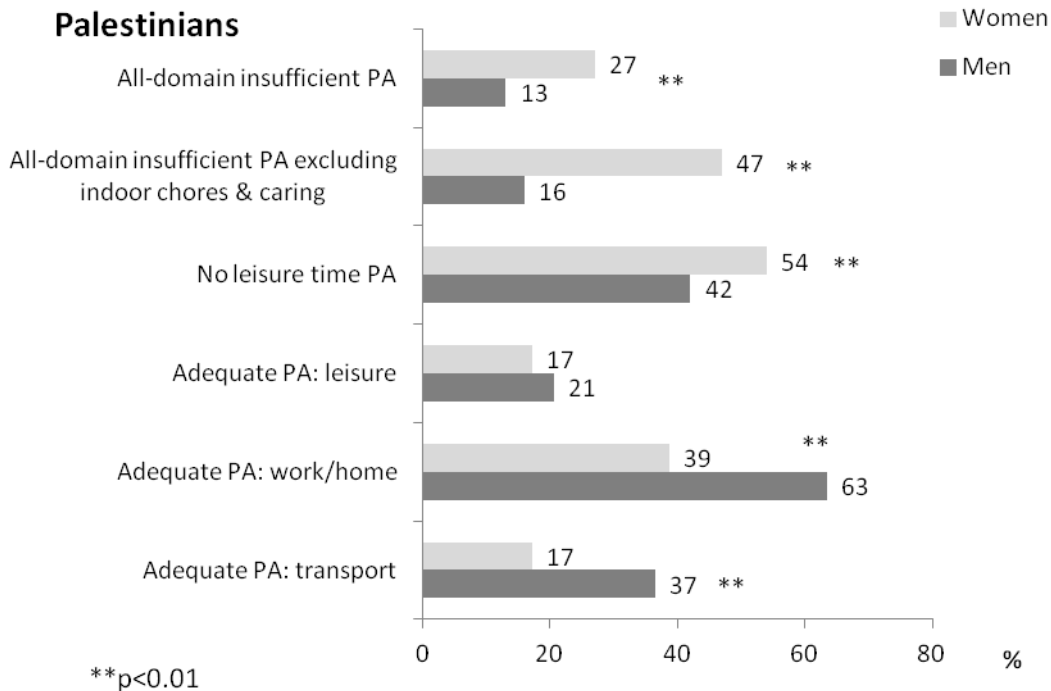

## Israelis

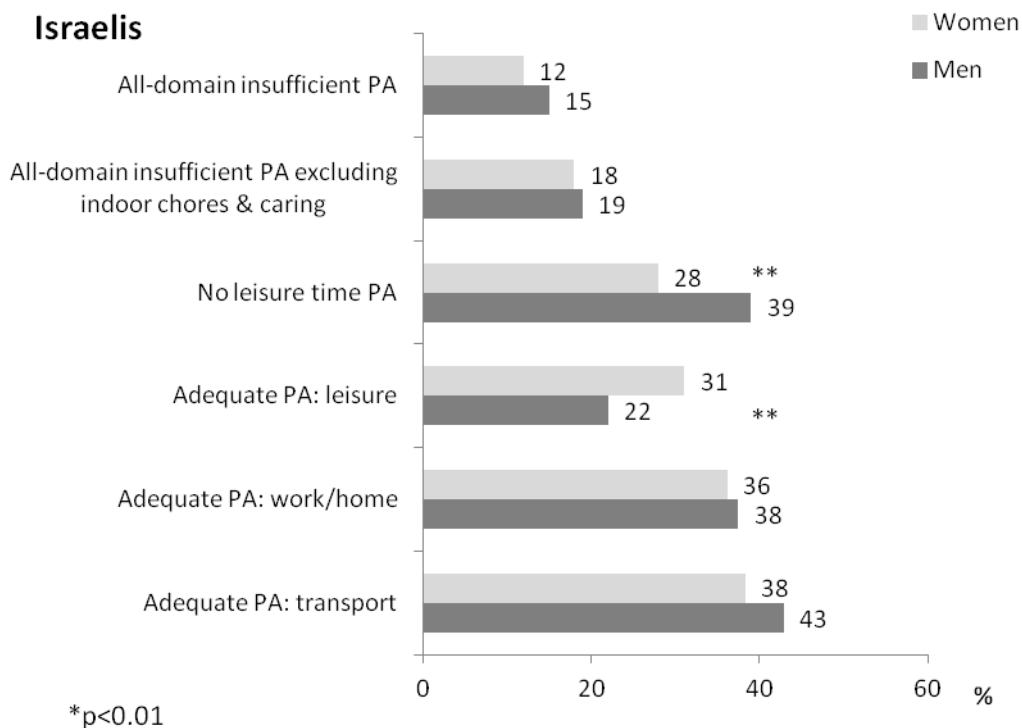

Supplement: MOESM3 [file 9493388]
